# Supplementary figures and images for: Seipin transmembrane segments critically function in triglyceride nucleation and lipid droplet budding from the membrane
Source: eLife journal article supplement (doi:10.7554/elife.75808), 2022-05-11

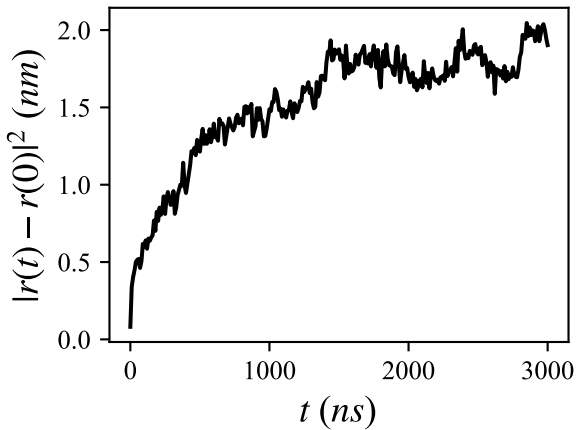

Supplement: supp [file elife-75808-supp-v1.zip]

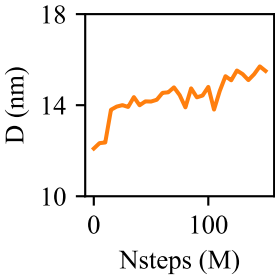

Supplement: supp [file elife-75808-supp-v1.zip]
